# Supplementary material
Source: MDPI journal article supplement (https://www.mdpi.com/1424-2818/13/5/178)
Supplement: s1 [file s1]

Supporting Information for:

# Planarians, a neglected component of biodiversity in groundwaters

Benedetta Barzaghi, Davide De Giorgi, Roberta Pennati, Raoul Manenti

| Species                             | References | Cave's Name                                                                                        | Cave's State   | Cave's Adaptation           |
|-------------------------------------|------------|----------------------------------------------------------------------------------------------------|----------------|-----------------------------|
| <i>Opisthobursa mexicana</i>        | [1]        | Las Grutas de Coconá                                                                               | Mexico         | unpigmented body            |
| <i>Opisthobursa josephinae</i>      | [1]        | Pozza Casa Bell                                                                                    | Mexico         | unpigmented body            |
| <i>Balliania thetisae</i>           | [1]        | NA                                                                                                 | Tahiti         | unpigmented body            |
| <i>Opisthobursa sp.</i>             | [1]        | Grutas de Languín                                                                                  | Guatemala      | unpigmented body            |
| <i>Kawakatsua pumila</i>            | [1]        | NA                                                                                                 | Panama         | unpigmented body            |
| <i>Hausera hauseri</i>              | [1]        | Crotes cave                                                                                        | Brazil         | unpigmented body            |
| <i>Novomitchellia sarawakana</i>    | [1]        | Water Polo Cave                                                                                    | Malaysia       | unpigmented body            |
| <i>Novomitchellia bursaelongata</i> | [1]        | Parakou                                                                                            | Benin Republic | unpigmented body            |
| <i>Hausera sp. 1</i>                | [1]        | Fur0 Feia cave                                                                                     | Brazil         | unpigmented body            |
| <i>Sphalloplana</i>                 | [2]        | NA                                                                                                 | United States  | adhesive organ              |
| <i>Dugesiidae cf. Girardia</i>      | [3]        | M. do Seu Jesus, Buraco do Bicho, Dona Benedita, Cinco de Ouros, Mimoso, Abismo Opossum, Lago Azul | Brazil         | NA                          |
| <i>Girardia multidiverticulata</i>  | [4]        | Buraco do Bicho                                                                                    | Brazil         | unpigmented body            |
| <i>Pasipha carajaensis</i>          | [5]        | Caves in the Serra Leste region                                                                    | Brazil         | lack of eye                 |
| <i>Pasipha tutameia</i>             | [5]        | Gruta de Santo Amaro II                                                                            | Brazil         | lack of eye                 |
| <i>Dugesia batuensis</i>            | [6]        | Dark Cave                                                                                          | Malaysia       | NA                          |
| <i>Dugesia deharvengi</i>           | [6]        | Tham Nen Noi                                                                                       | Thailand       | lack of eye                 |
| <i>Pasipha ferrariaphila</i>        | [7]        | ferruginous cave                                                                                   | Brazil         | lack of eye, eyes spreading |
| <i>Atrioplanaria morisii</i>        | [8]        | Grotta Ta0 di San Luigi                                                                            | Italy          | unpigmented body            |
| <i>Dendrocoelum beauchampi</i>      | [8]        | Grotta di Cavassola                                                                                | Italy          | unpigmented body            |
| <i>Atrioplanaria notadena</i>       | [8]        | Grotta Tanna da Suja                                                                               | Italy          | unpigmented body            |
| <i>Dendrocoelum benazzii</i>        | [8]        | Grotta di Stiffe                                                                                   | Italy          | unpigmented body            |
| <i>Dendrocoelum collini</i>         | [8]        | Grotta Nuova Villanova                                                                             | Italy          | unpigmented body            |
| <i>Dendrocoelum italicum</i>        | [8]        | Grotta Bus del Budrio                                                                              | Italy          | unpigmented body            |

|                                                                   |      |                                                 |                      |                                                                   |
|-------------------------------------------------------------------|------|-------------------------------------------------|----------------------|-------------------------------------------------------------------|
| <i>Dendrocoelum</i><br><i>sp.</i>                                 | [8]  | Grotta Grande di Pignone                        | Italy                | unpigmented body                                                  |
| <i>Dugesia brigantii</i>                                          | [8]  | Grotta di Bocca Lupara                          | Italy                | NA                                                                |
| <i>Polycelis</i><br><i>benazzii</i>                               | [8]  | Tana di Spettari                                | Italy                | unpigmented body                                                  |
| <i>Dendrocoelum</i><br><i>italicum</i>                            | [9]  | Grotta Bus del Budrio                           | Italy                | unpigmented body                                                  |
| <i>Dendrocoelum</i><br><i>leporii</i>                             | [10] | Frasassi Gorge                                  | Italy                | unpigmented body                                                  |
| <i>Dendrocoelum</i><br><i>obstinatum</i>                          | [11] | Movile Cave                                     | Romania              | unpigmented body, absence of<br>spermatophores, adhesive<br>organ |
| <i>Kenkia</i><br><i>glandulosa</i>                                | [12] | Devils Icebox cave                              | United States        | unpigmented body                                                  |
| <i>Hausera hauseri</i>                                            | [13] | Crotes cave                                     | Brazil               | unpigmented body (it shows<br>some primitive characters)          |
| <i>Sphalloplana</i><br>( <i>Sphalloplana</i> )<br><i>zeschi</i>   | [14] | Zesch Ranch Cave                                | United States        | unpigmented body                                                  |
| <i>Dendrocoelum</i><br><i>nekoum</i>                              | [15] | Riedschwandhohle                                | Switzerland          | unpigmented body                                                  |
| <i>Girardia</i><br><i>desiderensis</i>                            | [16] | Gruta da Baixa Fria                             | Brazil               | unpigmented body                                                  |
| <i>Girardia</i><br><i>pierremartini</i>                           | [16] | Toca do Charco, Lapa da<br>Fazenda São Bernardo | Brazil               | NA                                                                |
| <i>Kenkia</i><br><i>glandulosa</i>                                | [17] | Devil's Icebox cave                             | United States        | unpigmented body                                                  |
| <i>Dendrocoelopsis</i><br><i>americana</i>                        | [18] | NA                                              | United States        | unpigmented body                                                  |
| <i>Dendrocoelopsis</i><br><i>americana</i>                        | [18] | Mobley Cave                                     | United States        | unpigmented body                                                  |
| <i>Dugesia brigantii</i>                                          | [19] | Grotta di Bocca Lupara                          | Italy                | no adaptations to their<br>subterranean habitat are<br>apparent   |
| <i>Sphalloplana</i><br>( <i>Sphalloplana</i> )<br><i>percoeca</i> | [20] | Gregory's Cave                                  | United States        | unpigmented body                                                  |
| <i>Dendrocoelum</i><br><i>constrictum</i>                         | [21] | NA                                              | Tunisia              | unpigmented body, small eyes                                      |
| <i>Novomitchellia</i><br><i>bursaelongata</i>                     | [22] | NA                                              | Republic of<br>Benin | NA                                                                |
| <i>Dugesia sp.</i><br>( <i>species of</i><br><i>Sulawesi</i> )    | [23] | Gua Tanette                                     | Indonesia            | unpigmented body                                                  |
| <i>Dendrocoelopsis</i><br><i>americana</i>                        | [23] | Christian School Cave                           | United States        | unpigmented body, small eyes                                      |
| <i>Dendrocoelum</i><br><i>mariae</i>                              | [24] | NA                                              | Italy                | unpigmented body, anterior<br>adhesive organ                      |
| <i>Dendrocoelum</i><br><i>nuraghum</i>                            | [24] | Monte Majore Cave                               | Italy                | unpigmented body, anterior<br>adhesive organ                      |
| <i>Pasipha tutameia</i>                                           | [24] | Sa Ucca 'e su Peltusu<br>Cave                   | Italy                | unpigmented body, anterior<br>adhesive organ                      |
| <i>Phagocata</i><br><i>obscura</i>                                | [24] | Cuccuru Tiria Cave                              | Italy                | unpigmented body                                                  |
| <i>Phagocata sp. 1</i>                                            | [24] | Monte Majore Cave                               | Italy                | unpigmented body                                                  |

|                                                |      |                                                 |               |                                                                          |
|------------------------------------------------|------|-------------------------------------------------|---------------|--------------------------------------------------------------------------|
| <i>Phagocata sp. 2</i>                         | [24] | NA                                              | Italy         | unpigmented body                                                         |
| <i>Phagocata sp. 3</i>                         | [25] | NA                                              | Italy         | unpigmented body, each eye is accompanied by one small supernumerary eye |
| <i>Dendrocoelopsis americana</i>               | [25] | Stadin Elbow Cave                               | United States | NA                                                                       |
| <i>Sphalloplana (Sphalloplana) evaginata</i>   | [25] | Moles Cave                                      | United States | NA                                                                       |
| <i>Dendrocoelum spatiosum</i>                  | [26] | NA                                              | Spain         | unpigmented body, small eyes close together                              |
| <i>Kenkia rhynchida</i>                        | [27] | Malheur Cave                                    | United States | unpigmented body                                                         |
| <i>Sphalloplana (Speophila) pricei</i>         | [27] | Brownstone Cave, Refton Cave                    | United States | unpigmented body                                                         |
| <i>Sphalloplana (Speophila) buchanani</i>      | [27] | Mammoth Cave                                    | United States | unpigmented body                                                         |
| <i>Sphalloplana (Sphalloplana) percoeca</i>    | [27] | Mammoth Cave                                    | United States | unpigmented body                                                         |
| <i>Phagocata subterranea</i>                   | [27] | DoOldson's Cave                                 | United States | unpigmented body                                                         |
| <i>Sphalloplana mohri</i>                      | [28] | caves of Texas, Oklahoma, Arkansas and Missouri | United States | unpigmented body                                                         |
| <i>Sorocelis americana</i>                     | [28] | Bat Cave                                        | United States | unpigmented body, eyes numerous in paired lateral arcs on the head       |
| <i>Sphalloplana (Sphalloplana) alabamensis</i> | [29] | Old Saltee Cave                                 | United States | unpigmented body, adhesive organ                                         |
| <i>Sphalloplana (Sphalloplana) virginiana</i>  | [29] | Showhalter's Cave                               | United States | unpigmented body, adhesive organ                                         |
| <i>Sphalloplana (Sphalloplana) kansensis</i>   | [29] | NA                                              | United States | unpigmented body, adhesive organ                                         |
| <i>Sphalloplana (Speophila) hubrichti</i>      | [29] | Morrison's Cave                                 | United States | unpigmented body, adhesive organ                                         |
| <i>Phagocata cavernicola</i>                   | [30] | Evac Cave                                       | United States | unpigmented body                                                         |
| <i>Sphalloplana (Sphalloplana) georgiana</i>   | [30] | Waterfall Cave                                  | United States | unpigmented body, adhesive organ                                         |
| <i>Sphalloplana (Speophila) hoffmasteri</i>    | [30] | Blowing Cave                                    | United States | unpigmented body, adhesive organ                                         |
| <i>Kenkia glandulosa</i>                       | [30] | Rock Bridge Cave                                | United States | unpigmented body, adhesive organ                                         |
| <i>Atrioplanaria Morisii</i>                   | [31] | Tana di S. Luigi                                | Italy         | unpigmented body, small eyes                                             |
| <i>Eviella hynesae</i>                         | [32] | NA                                              | Australia     | unpigmented body, anterior sensory pits                                  |

|                                              |      |                                |                 |                                                              |
|----------------------------------------------|------|--------------------------------|-----------------|--------------------------------------------------------------|
| <i>Dendrocoelum benazzii</i>                 | [33] | Cave of Stiffe                 | Italy           | unpigmented body                                             |
| <i>Kenkia glandulosa</i>                     | [34] | Devil's Icebox or Connors Cave | United States   | unpigmented body, adhesive organ                             |
| <i>Kenkia lewisi</i>                         | [34] | Mystery Cave , Tom Moore Cave  | United States   | unpigmented body, adhesive organ                             |
| <i>Sphalloplana (Speophila) hoffmasteri</i>  | [34] | Blowhole Cave                  | United States   | unpigmented body, adhesive organ                             |
| <i>Sphalloplana (Speophila) hoffmasteri</i>  | [35] | Organ Cave                     | United States   | unpigmented body, adhesive organ                             |
| <i>Sphalloplana (Sphalloplana) percaeca</i>  | [36] | Mammoth Cave                   | United States   | unpigmented body                                             |
| <i>Opisthobursa mexicana</i>                 | [37] | Grutas de Coconà               | Mexico          | unpigmented body                                             |
| <i>Balliania thetisae</i>                    | [38] | Maraa Cave                     | Tahiti          | unpigmented body                                             |
| <i>Novomitchellia sarawakana</i>             | [38] | Water Polo Cave                | Malaysia        | unpigmented body                                             |
| <i>Dugesia batuensis</i>                     | [39] | Batu Caves                     | Malaya          | unpigmented body                                             |
| <i>Atrioplanaria aquaebellae</i>             | [40] | NA                             | Israel          | unpigmented body, small eyes                                 |
| <i>Atrioplanaria racovitzai</i>              | [40] | Caves                          | Rumania         | NA                                                           |
| <i>Atrioplanaria prosorchis</i>              | [40] | NA                             | Austria         | NA                                                           |
| <i>Atrioplanaria opisthogona</i>             | [40] | Caves                          | Yugoslavia      | NA                                                           |
| <i>Atrioplanaria notadena</i>                | [40] | NA                             | France, Germany | NA                                                           |
| <i>Atrioplanaria delamarei</i>               | [40] | NA                             | France          | NA                                                           |
| <i>Atrioplanaria notadena</i>                | [41] | Grotte de La Balme             | France          | NA                                                           |
| <i>Phagocata albata</i>                      | [42] | Na                             | Japan           | unpigmented body                                             |
| <i>Phagocata tenella</i>                     | [43] | NA                             | Japan           | unpigmented body, small eyes<br>sometimes supernumerary eyes |
| <i>Kenkia glandulosa</i>                     | [44] | Devils Icebox cave             | United States   | unpigmented body                                             |
| <i>Kenkia lewisi</i>                         | [44] | Mystery Cave                   | United States   | unpigmented body, adhesive organ                             |
| <i>Sphalloplana (Sphalloplana) evaginata</i> | [44] | NA                             | United States   | unpigmented body, adhesive organ                             |
| <i>Sphalloplana (Sphalloplana) hubrichti</i> | [44] | Kohm's Cave                    | United States   | unpigmented body, adhesive organ                             |
| <i>Sphalloplana (Sphalloplana) percoeca</i>  | [45] | NA                             | United States   | unpigmented body, adhesive organ                             |

|                                                                      |      |                                                                         |               |                                           |
|----------------------------------------------------------------------|------|-------------------------------------------------------------------------|---------------|-------------------------------------------|
| <i>Sphalloplana</i><br>( <i>Sphalloplana</i> )<br><i>evaginata</i>   | [45] | Klump Cave, Crevice<br>Cave, Berome Moore<br>Cave, Garbage Hole<br>Cave | United States | unpigmented body, adhesive<br>organ       |
| <i>Sphalloplana</i><br>( <i>Sphalloplana</i> )<br><i>kansensis</i>   | [45] | NA                                                                      | United States | unpigmented body, adhesive<br>organ       |
| <i>Sphalloplana</i><br>( <i>Sphalloplana</i> )<br><i>californica</i> | [45] | Bower Cave                                                              | United States | unpigmented body, adhesive<br>organ       |
| <i>Sphalloplana</i><br>( <i>Sphalloplana</i> )<br><i>culveri</i>     | [45] | Harper Cave                                                             | United States | unpigmented body, adhesive<br>organ       |
| <i>Sphalloplana</i><br>( <i>Sphalloplana</i> )<br><i>consimilis</i>  | [45] | Caves                                                                   | United States | unpigmented body, adhesive<br>organ       |
| <i>Sphalloplana</i><br>( <i>Sphalloplana</i> )<br><i>subtilis</i>    | [45] | NA                                                                      | United States | unpigmented body, small<br>adhesive organ |
| <i>Sphalloplana</i><br>( <i>Speophila</i> )<br><i>virginiana</i>     | [45] | Showalter's Cave                                                        | United States | unpigmented body, adhesive<br>organ       |
| <i>Sphalloplana</i><br>( <i>Speophila</i> )<br><i>holsingeri</i>     | [45] | NA                                                                      | United States | unpigmented body, adhesive<br>organ       |
| <i>Sphalloplana</i><br>( <i>Speophila</i> )<br><i>weingartneri</i>   | [45] | Bronsons Cave                                                           | United States | unpigmented body, adhesive<br>organ       |
| <i>Sphalloplana</i><br>( <i>Speophila</i> )<br><i>buchanani</i>      | [45] | Mammoth Cave                                                            | United States | unpigmented body, adhesive<br>organ       |
| <i>Sphalloplana</i><br>( <i>Speophila</i> )<br><i>pricei</i>         | [45] | Brownstone Cave,<br>Refton Cave, Upper<br>Johnson Cave                  | United States | unpigmented body, adhesive<br>organ       |
| <i>Sphalloplana</i><br>( <i>Speophila</i> )<br><i>hubrichti</i>      | [45] | NA                                                                      | United States | unpigmented body, adhesive<br>organ       |
| <i>Sphalloplana</i><br>( <i>Speophila</i> )<br><i>chandleri</i>      | [45] | NA                                                                      | United States | unpigmented body, adhesive<br>organ       |
| <i>Sphalloplana</i><br>( <i>Speophila</i> )<br><i>mohri</i>          | [45] | NA                                                                      | United States | unpigmented body, adhesive<br>organ       |
| <i>Dugesia</i><br><i>mckenziei</i>                                   | [46] | La Cueva de los<br>Murciélagos                                          | Mexico        | unpigmented body, small eyes              |
| <i>Dugesia</i><br><i>typhlomexicana</i>                              | [47] | La Cueva de Ia Milna                                                    | Mexico        | unpigmented body, adhesive<br>organ       |
| <i>Dugesia</i><br><i>barbarae</i>                                    | [47] | La Cueva de Ia Capilla                                                  | Mexico        | unpigmented body, adhesive<br>organ       |
| <i>Dendrocoleopsis</i><br><i>americana</i>                           | [48] | NA                                                                      | United States | unpigmented body                          |
| <i>Dendrocoelopsis</i><br><i>lactea</i>                              | [48] | NA                                                                      | Japan         | unpigmented body                          |

Supplementary Table 1: List of all the mentions of groundwater-dwelling planarian species retrieved within the 48 papers selected during the systematic review process carried out. The

locality of origin (when available) and the degree of adaptation to underground life are indicated for each species

## References

1. Benitez-Alvarez, L.; Leal-Zanchet, A.M.; Ocegüera-Figueroa, A.; Ferreira, R.L.; Bento, D.D.; Braccini, J.; Sluys, R.; Riutort, M. Phylogeny and biogeography of the Cavernicola (Platyhelminthes: Tricladida): Relicts of an epigean group sheltering in caves? *Molecular Phylogenetics and Evolution* **2020**, *145*, doi:10.1016/j.ympev.2019.106709.
2. Carpenter, J.H. Systematics and Ecology of Cave Planarians of the United States. *American Zoologist* **1970**, *10*, 543-+.
3. Cordeiro, L.M.; Borghezán, R.; Trajano, E. Subterranean biodiversity in the Serra da Bodoquena karst area, Paraguay river basin, Mato Grosso do Sul, Southwestern Brazil. *Biota Neotropica* **2014**, *14*, doi:10.1590/1676-06032014011414.
4. de Souza, S.T.; Morais, A.L.N.; Cordeiro, L.M.; Leal-Zanchet, A.M. The first troglobitic species of freshwater flatworm of the suborder Continenticola (Platyhelminthes) from South America. *Zookeys* **2015**, 10.3897/zookeys.470.8728, 1-16, doi:10.3897/zookeys.470.8728.
5. do Amaral, S.V.; Leal-Zanchet, A.M.; Ferreira, R.L. Two new species of Neotropical land flatworms (Platyhelminthes: Continenticola) occurring in ferruginous and limestone caves. *Zoologischer Anzeiger* **2019**, *283*, 231-241, doi:10.1016/j.jcz.2019.09.008.
6. Khang, T.F.; Tan, S.H.; Panha, S.; Mohamed, Z. Molecular phylogenetics and sequence analysis of two cave-dwelling Dugesia species from Southeast Asia (Platyhelminthes: Tricladida: Dugesiidae). *Raffles Bulletin of Zoology* **2017**, *65*, 515-524.
7. Leal-Zanchet, A.; Marques, A. Searching for shelter in a ferruginous cave? A new species of Pasipha from a plateau in the Brazilian savanna (Platyhelminthes, Tricladida). *Zookeys* **2018**, 10.3897/zookeys.776.26308, 13-25, doi:10.3897/zookeys.776.26308.
8. Manenti, R.; Barzaghi, B.; Lana, E.; Stocchino, G.A.; Manconi, R.; Lunghi, E. The stenoendemic cave-dwelling planarians (Platyhelminthes, Tricladida) of the Italian Alps and Apennines: Conservation issues. *Journal for Nature Conservation* **2018**, *45*, 90-97, doi:10.1016/j.jnc.2018.08.001.
9. Manenti, R.; Barzaghi, B.; Tonni, G.; Ficetola, G.F.; Melotto, A. Even worms matter: cave habitat restoration for a planarian species increased environmental suitability but not abundance. *Oryx* **2019**, *53*, 216-221, doi:10.1017/s0030605318000741.
10. Stocchino, G.A.; Sluys, R.; Montanari, A.; Manconi, R. A new species of stygobiont freshwater planarian (Platyhelminthes, Tricladida) from a chemoautotrophic ecosystem: the Frasassi karst in Italy. *Zootaxa* **2017**, *4323*, 547-560, doi:10.11646/zootaxa.4323.4.7.
11. Stocchino, G.A.; Sluys, R.; Kawakatsu, M.; Sarbu, S.M.; Manconi, R. A new species of freshwater flatworm (Platyhelminthes, Tricladida, Dendrocoelidae) inhabiting a chemoautotrophic groundwater ecosystem in Romania. *European Journal of Taxonomy* **2017**, *342*, 1-21, doi:10.5852/ejt.2017.342.
12. Wicks, C.; Noltie, D.B.; Peterson, E.W.; Dogwiler, T. Disturbances in the habitat of *Macrocotyla glandulosa* (Kenk). *Ecohydrology* **2010**, *3*, 116-125, doi:10.1002/eco.102.
13. Leal-Zanchet, A.M.; de Souza, S.T.; Ferreira, R.L. A new genus and species for the first recorded cave-dwelling Cavernicola (Platyhelminthes) from South America. *Zookeys* **2014**, 10.3897/zookeys.442.8199, 1-15, doi:10.3897/zookeys.442.8199.
14. Mitchell, R.W. Cave adapted flatworms of Texas - systematics, natural history, and responses to light and temperature. *American Zoologist* **1970**, *10*, 547-&.
15. Sluys, R. A new, sibling species of cave flatworm from Switzerland (Platyhelminthes, Tricladida, Dendrocoelidae). *Revue Suisse De Zoologie* **2012**, *119*, 181-188, doi:10.5962/bhl.part.150024.

16. Souza, S.; Morais, A.L.; Bichuette, M.E.; Leal-Zanchet, A. Two new species of freshwater flatworms (Platyhelminthes: Tricladida: Continenticola) from South American caves. *Zootaxa* **2016**, *4092*, 107-121, doi:10.11646/zootaxa.4092.1.6.
17. Clark Jr., D.R.; Clawson, L.R.; Stafford, C.J. Gray Bats Killed by Dieldrin at Two Additional Missouri Caves: Aquatic Macroinvertebrates Found Dead. *Bulletin of Environmental Contamination and Toxicology* **1983**, *30*, 214-218.
18. Darlington, T.J.; Chandler, C.M. A Survey of the Planarians (Tricladida: Paludicola) of Arkansas. *The Southwestern Naturalist* **1979**, *24*(1), 141-148, doi:10.2307/3670634.
19. De Vries, E.J.; Benazzi, M. *Dugesia brigantii* n.sp., a freshwater planarian found in an Italian cave. *Bollettino di Zoologia* **1983**, *50*, 263-268, doi:10.1080/11250008309439451.
20. Glasgow, B.; Pierce, P. A Cave Planarian, *Sphalloplana percoeca*, (Platyhelminthes, Tricladida, Kenkiidae) From Great Smoky Mountains National Park. *Journal of North Carolina Academy of Science* **2015**, *131*(1), 15-17, doi:10.7572/2167-5872-131.1.15.
21. Harrath, A.H.; Sluys, R.; Ghlala, A.; Alwasel, S. The first subterranean freshwater planarians from North Africa, with an analysis of adenodactyl structure in the genus *Dendrocoelum* (Platyhelminthes, Tricladida, Dendrocoelidae). *Journal of Cave and Karst Studies* **2012**, *74*(1), 48-57, doi:10.4311/2011LSC0215.
22. Harrath, A.H.; Mansour, L.; Lagnika, M.; Sluys, R.; Boutin, C.; Alwasel, S.; Poch, A.; Riutort, M. A molecular analysis of the phylogenetic position of the suborder Cavernicola within the Tricladida (Platyhelminthes), with the description of a new species of stygobiont flatworm from Benin. *Zoological Journal of the Linnean Society* **2016**, *178*, 482-491, doi:10.1111/zoj.12430.
23. Kawakatsu, M.; Mitchell, R.W. Record of a Troglotic Planarian from Tanette Cave located in the Maros Karst, Sulawesi (Celebes), Indonesia (Turbellaria, Tricladida, Paludicola). **1989**.
24. Stocchino, G.A.; Marcia, P.; Manconi, R.; Sluys, R. Subterranean Aquatic Planarians Of Sardinia, With A Discussion On The Penial Flagellum And The Bursal Canal Sphincter In The Genus *Dendrocoelum* (Platyhelminthes, Tricladida, Dendrocoelidae). *Journal of cave and karst studies the National Speleological Society bulletin* **2013**, *75*, 93-112, doi:10.4311/2011LSC0252.
25. Slay, M.E.; Elliott, W.R.; Sluys, R. Cavernicolous Missouri Triclad (Platyhelminthes: Turbellaria) Records. *The Southwestern Naturalist* **2006**, *51*(2), 251-252, doi:10.1894/0038-4909(2006)51[255:NROCFM]2.0.CO;2
26. Vila-Farré, M.; Sluys, R.; Handberg-Thorsager, M.; Romero, R. Freshwater planarians (Platyhelminthes, Tricladida) from the Iberian Peninsula and Greece: Diversity and notes on ecology. *Zootaxa* **2011**, *2779*, 1-38, doi:10.11646/zootaxa.2779.1.1.
27. Hyman, L.H. Studies on the Morphology, Taxonomy, and Distribution of North American Triclad Turbellaria. VIII. Some Cave Planarians of the United States. *Transactions of the American Microscopical Society* **1937**, *56*(4), 457-477.
28. Hyman, L.H. North American Triclad Turbellaria. X. Additional Species of Cave Planarians. *Transactions of the American Microscopical Society* **1939**, *58*(3), 276-284, doi:10.2307/3222880.
29. Hyman, L.H. North American Triclad Turbellaria XI. New, Chiefly Cavernicolous, Planarians. *The American Midland Naturalist* **1945**, *34*(2), 475-484, doi:10.2307/2421135.
30. Hyman, L.H. North American Triclad Turbellaria. 15. Three New Species. *Transactions of the American Microscopical Society* **1956**, *70*(2), 154-167, doi:10.2307/3223427.
31. Benazzi, M. *Atrioplanaria morisii* N.Sp., A New Cave Planarian from Italy. *Bollettino di Zoologia* **1977**, *48*, 327-335 doi:10.1080/11250007709429272.

32. Ball, I.R. A new and primitive retrobursal planarian from Australian fresh waters (Platyhelminthes, Turbellaria, Tricladida). **1977**.
33. Del Papa, R. *Dendrocoelum (Dendirocoelides) Benazzii* N. Sp. from the Cave of Stiffe (Abruzzo). *Bollettino di Zoologia* **1973**, 40, 253-259, doi:10.1080/11250007309429240.
34. Kenk, R. Fresh-Water Triclads (Turbellaria) of North America. VII. The Genus *Macrocotyla*. *Transactions of the American Microscopical Society* **1975**, 94(3), 324-339, doi:10.2307/3225497.
35. Simon, K.S.; Benfield, E.F.; Macko, S.A. Food web structure and the role of epilithic biofilms in cave streams. *Ecology* **2003**, 88, 2395-2406, doi:0.1890/02-334.
36. Buchanan, J.W. Notes on an American Cave Flatworm, *Sphalloplana Percaeca* (Packard). *Ecology* **1936**, 17(2), 194-211 doi:10.2307/1931459.
37. Benazzi, M. Notizie preliminari sulle planarie raccolte nella seconda spedizione Lincea in Messico. *Atti della Accademia Nazionale dei Lincei. Classe di Scienze Fisiche, Matematiche e Naturali. Rendiconti* **1972**, 8(52), 403-405.
38. Sluys, R. A monograph of the Dimarcusidae (Platyhelminthes, Seriata, Tricladida). *Zoologica Scripta* **1990**, 19, 13-29, doi:10.1111/j.1463-6409.1990.tb00237.x.
39. Ball, I.R. Freshwater triclads (Turbellaria, Tricladida) from the oriental region *Zoological Journal of the Linnean Society* **1970**, 48, 271-294, doi:10.1111/j.1096-3642.1970.tb00742.x.
40. Bromley, H.J. The morphology and reproduction of a new species of a *Trioplanaria De Beauchamp* (Turbellaria: Tricladida) From Israel. *Israel Journal of Ecology and Evolution* **1983**, 32, 171-184, doi:10.1080/00212210.1983.10688545.
41. Ginet, R.; Puglisi, R. Ecologie de *Fonticola notadena* de Beaucham (Turbellarie, Triclade) dans la grotte de La Balme (Isere, France); survie en periode de secheresse. *International Journal of Speleology* **1964**, 1, 203-216, doi:10.5038/1827-806X.1.1.16.
42. Ichikawa, A.; Kawakatsu, M. *Phagocata albata*, a New Probably Subterranean Freshwater Planarian, from Hokkaido. *Annot Zool Japon* **1962**, 35, 29-37.
43. Ichikawa, A.; Kawakatsu, M. *Phagocata tenella*, a New Freshwater Planaria, from Hokkaido. *Annot Zool Japon* **1963**, 36, 102-107.
44. Elliott, W.R. Zoogeography and biodiversity of Missouri caves and karst. *Journal of cave and karst studies the National Speleological Society bulletin* **2007**, 69(1).
45. Kenk, R. Freshwater Triclads (Turbellaria) of North America, IX: The Genus *Sphalloplana*. *Smithsonian Contributions to Zoology* **1977**, 10.5479/si.00810282.246, 1-38, doi:10.5479/si.00810282.246.
46. Mitchell, R.W.; Kawakatsu, M. A new cave-adapted planarian (Tricladida, Paludicola, Planariidae) from Chiapas, Mexico. *Association for Mexican Cave Studies* **1973**, 5.
47. Mitchell, R.W.; Kawakatsu, M. Freshwater cavernicole planarians from Mexico: new troglobitic and troglophilic *Dugesia* from caves of the Sierra de Guatemala. *Biospéologie* **1972**.
48. Kawakatsu, M.; Vaughn, C.C.; Mitchell, R.W. *Dendrocoelopsis Americana* (Hyman, 1939) From Christian School Cave, The Ozark Plateau, Oklahoma, U.S.A. (Turbellaria, Seriata, Tricladida, Paludicola). *The Southwestern Naturalist* **1995**, 51(2), 251-252, doi:10.1894/0038-4909(2006)51.
